# Supplementary material for: Small RNA expression and deep sequencing analyses of the nucleolus reveal the presence of nucleolus-associated microRNAs
Source: PubMed Central journal article supplement — FEBS Open Bio. 2014 May 2;4:441–9. doi: 10.1016/j.fob.2014.04.010 (PMC4050192; doi:10.1016/j.fob.2014.04.010), 2014-05-02
Supplement: mmc1.pdf [file mmc1.pdf]

## SUPPLEMENTARY DATA

**Table S1.** Top-ranking nucleolar miRNAs present in HeLa and MCF7 NCode arrays.

**Table S2.** Frequency of miRNA reads in the subcellular compartments.

**Figure S1.** Scatter plot analyses of miRNA reads in the cellular compartments. **(A)** Total cellular reads compared to cytoplasmic reads. **(B)** Nuclear reads compared to cytoplasmic reads. **(C)** Nucleolar reads compared to nuclear reads. **(D)** Nucleolar reads compared to cytoplasmic reads. Read cut-offs; A and B  $\geq 50$  reads, C and D nucleolar reads  $\geq 5$ . Pearson correlation coefficients are indicated ( $r$ ).

**Figure S2.** MiR-21 and miR-31 expression in subcellular compartments in Dicer-proficient and deficient cells. RNA was isolated from subcellular compartments of HCT116 wild -type and HCT116 Dicer  $-/-$  cells. RNA (25  $\mu$ g) was separated on 15% gel and probed by Northern hybridization using miR-21 and miR-31 LNA probes. The respective mature and precursor forms are shown. hY1 was used as a control for cellular fractionation. Relative abundancies of miRNAs are expressed as compared to total cellular RNA in each cell line set as 1.

**Supplementary Table S1.** Top-ranking nucleolar miRNAs present in HeLa and MCF7 NCode arrays.

| microRNA     | MCF7                |                    | microRNA     | HeLa                |                    |
|--------------|---------------------|--------------------|--------------|---------------------|--------------------|
|              | Nucleolar intensity | Cellular intensity |              | Nucleolar intensity | Cellular intensity |
| hsa-let-7a   | 7.9                 | 15.5               | hsa-let-7a   | 9.3                 | 15.3               |
| hsa-let-7b   | 7.4                 | 14.0               | hsa-let-7b   | 8.8                 | 14.0               |
| hsa-let-7c   | 7.5                 | 14.0               | hsa-let-7c   | 8.9                 | 14.4               |
| hsa-let-7d   | 7.2                 | 14.4               | hsa-let-7d   | 7.9                 | 13.3               |
| hsa-let-7e   | 6.7                 | 13.6               | hsa-let-7f   | 8.7                 | 14.9               |
| hsa-let-7f   | 7.2                 | 14.5               | hsa-let-7g   | 8.5                 | 14.5               |
| hsa-let-7g   | 6.7                 | 12.7               | hsa-let-7i   | 9.2                 | 15.4               |
| hsa-let-7i   | 7.7                 | 14.4               | hsa-miR-100  | 8.0                 | 13.2               |
| hsa-miR-100  | 6.3                 | 6.8                | hsa-miR-103  | 8.4                 | 13.6               |
| hsa-miR-103  | 7.4                 | 14.5               | hsa-miR-106a | 9.1                 | 15.3               |
| hsa-miR-106a | 7.2                 | 11.9               | hsa-miR-106b | 8.3                 | 13.8               |
| hsa-miR-106b | 7.1                 | 14.0               | hsa-miR-107  | 8.5                 | 13.8               |
| hsa-miR-107  | 7.2                 | 14.2               | hsa-miR-125a | 8.0                 | 12.5               |
| hsa-miR-125b | 7.1                 | 10.2               | hsa-miR-125b | 8.7                 | 13.7               |
| hsa-miR-15a  | 6.2                 | 12.5               | hsa-miR-15a  | 7.9                 | 13.2               |
| hsa-miR-15b  | 6.9                 | 13.7               | hsa-miR-15b  | 8.5                 | 14.1               |
| hsa-miR-16   | 7.7                 | 14.3               | hsa-miR-16   | 9.4                 | 15.4               |
| hsa-miR-17   | 6.7                 | 11.4               | hsa-miR-17   | 8.7                 | 14.6               |
| hsa-miR-182  | 6.1                 | 12.9               | hsa-miR-181b | 8.0                 | 13.1               |
| hsa-miR-191  | 7.4                 | 14.4               | hsa-miR-188  | 7.9                 | 10.8               |
| hsa-miR-19b  | 6.8                 | 11.5               | hsa-miR-18a  | 7.9                 | 13.6               |
| hsa-miR-200b | 6.4                 | 13.6               | hsa-miR-19a  | 8.0                 | 14.1               |
| hsa-miR-200c | 7.1                 | 14.7               | hsa-miR-19b  | 8.8                 | 14.9               |
| hsa-miR-20a  | 7.2                 | 11.2               | hsa-miR-20a  | 9.2                 | 15.5               |
| hsa-miR-20b  | 6.4                 | 9.9                | hsa-miR-20b  | 8.5                 | 14.3               |
| hsa-miR-21   | 7.8                 | 15.1               | hsa-miR-21   | 9.8                 | 15.9               |
| hsa-miR-22   | 6.3                 | 12.7               | hsa-miR-22   | 8.2                 | 13.6               |
| hsa-miR-23a  | 9.0                 | 14.0               | hsa-miR-221  | 7.9                 | 12.7               |
| hsa-miR-23b  | 8.1                 | 13.3               | hsa-miR-224  | 8.0                 | 13.6               |
| hsa-miR-24   | 8.3                 | 14.4               | hsa-miR-23a  | 10.5                | 16.6               |
| hsa-miR-25   | 7.0                 | 13.8               | hsa-miR-23b  | 9.9                 | 16.0               |
| hsa-miR-26a  | 6.7                 | 12.5               | hsa-miR-24   | 10.1                | 16.4               |
| hsa-miR-27a  | 6.8                 | 11.2               | hsa-miR-25   | 8.6                 | 14.3               |
| hsa-miR-27b  | 6.4                 | 12.5               | hsa-miR-26a  | 8.2                 | 13.6               |
| hsa-miR-29a  | 6.5                 | 10.8               | hsa-miR-27a  | 9.4                 | 15.6               |
| hsa-miR-30a  | 6.1                 | 9.0                | hsa-miR-27b  | 8.2                 | 13.6               |
| hsa-miR-30c  | 6.6                 | 11.0               | hsa-miR-29a  | 8.6                 | 14.5               |
| hsa-miR-30d  | 6.6                 | 12.9               | hsa-miR-30a  | 8.3                 | 13.5               |
| hsa-miR-320  | 6.8                 | 12.9               | hsa-miR-30c  | 8.2                 | 13.0               |
| hsa-miR-342  | 6.4                 | 13.6               | hsa-miR-30d  | 8.2                 | 13.4               |
| hsa-miR-425  | 6.3                 | 13.0               | hsa-miR-320  | 8.5                 | 13.9               |
| hsa-miR-494  | 6.8                 | 12.6               | hsa-miR-324  | 8.5                 | 11.5               |
| hsa-miR-594  | 6.6                 | 10.7               | hsa-miR-372  | 8.0                 | 11.8               |
| hsa-miR-93   | 7.1                 | 14.2               | hsa-miR-594  | 8.5                 | 12.3               |
| hsa-miR-99a  | 6.2                 | 8.5                | hsa-miR-92   | 8.4                 | 13.4               |
| hsa-miR-99b  | 6.1                 | 12.2               | hsa-miR-93   | 8.6                 | 14.1               |

Supplementary Table S2. MiRNA reads in the subcellular fractions.

|          | Nucleolus |          | Cytoplasm |          | Nuclear |          | Cellular |
|----------|-----------|----------|-----------|----------|---------|----------|----------|
| MIR24    | 972       | MIR21    | 120398    | MIR21    | 118190  | MIR21    | 101664   |
| MIR21    | 691       | MIR24    | 18051     | MIR24    | 34499   | MIR24    | 20998    |
| MIR93    | 113       | MIR23A   | 16701     | MIR23A   | 5097    | MIR23A   | 18631    |
| MIR31    | 49        | MIRLET7A | 4622      | MIR92A   | 4593    | MIRLET7A | 4065     |
| MIR1307  | 38        | MIR27A   | 2868      | MIR103A  | 2775    | MIR17    | 2873     |
| MIR19B   | 34        | MIR99A   | 2422      | MIR17    | 2626    | MIR92A   | 2573     |
| MIR574   | 24        | MIR17    | 2240      | MIR18A   | 2463    | MIR27A   | 2328     |
| MIR151   | 19        | MIR92A   | 1930      | MIR27A   | 2093    | MIR18A   | 2283     |
| MIR532   | 17        | MIR18A   | 1436      | MIR99A   | 1782    | MIR103A  | 2157     |
| MIR148   | 15        | MIRLET7B | 1422      | MIR30C   | 1624    | MIR99A   | 2042     |
| MIR18A   | 12        | MIR15B   | 1416      | MIR15B   | 1283    | MIR93    | 1535     |
| MIR425   | 7         | MIRLET7F | 1240      | MIRLET7F | 1248    | MIR15B   | 1454     |
| MIR191   | 6         | MIR100   | 1145      | MIR93    | 1241    | MIR30C   | 1305     |
| MIR181A2 | 5         | MIR93    | 1072      | MIRLET7A | 1112    | MIR100   | 1269     |
| MIR19A   | 5         | MIRLET7I | 1043      | MIR19B   | 1075    | MIRLET7B | 1234     |
| MIR30C   | 5         | MIR103A  | 1042      | MIR125B  | 1035    | MIR20A   | 1169     |
| MIR128-1 | 4         | MIR30A   | 967       | MIR100   | 1010    | MIR23B   | 1139     |
| MIR149   | 4         | MIR30C   | 967       | MIR19A   | 711     | MIR19B   | 994      |
| MIR320A  | 4         | MIR125B  | 908       | MIR106B  | 694     | MIRLET7F | 962      |
| MIR452   | 4         | MIR20A   | 852       | MIR151   | 657     | MIRLET7I | 756      |
| MIR484   | 4         | MIR23B   | 806       | MIR30A   | 649     | MIR125B  | 727      |
| MIR125A  | 3         | MIR19B   | 727       | MIR16    | 603     | MIR30A   | 634      |
| MIR15B   | 3         | MIRLET7C | 582       | MIR23B   | 581     | MIR29B   | 627      |
| MIR17    | 3         | MIR16    | 560       | MIR20A   | 549     | MIR151   | 618      |
| MIR424   | 3         | MIR26A   | 553       | MIR30B   | 538     | MIR106B  | 596      |
| MIR96    | 3         | MIR106B  | 550       | MIR107   | 516     | MIR320A  | 557      |
| MIR100   | 2         | MIR19A   | 522       | MIR191   | 426     | MIR30B   | 518      |
| MIR103A1 | 2         | MIR30B   | 506       | MIR10A   | 424     | MIR224   | 465      |
| MIR106B  | 2         | MIRLET7D | 492       | MIR320A  | 395     | MIR31    | 456      |
| MIR1272  | 2         | MIRLET7G | 473       | MIR31    | 377     | MIR196A  | 443      |
| MIR128-2 | 2         | MIR320A  | 402       | MIR196A  | 343     | MIR191   | 428      |
| MIR152   | 2         | MIR151   | 398       | MIR338   | 341     | MIR16    | 401      |
| MIR16-2  | 2         | MIR224   | 385       | MIR27B   | 338     | MIR26A   | 401      |
| MIR182   | 2         | MIR10A   | 349       | MIRLET7B | 329     | MIRLET7G | 367      |
| MIR183   | 2         | MIR27B   | 328       | MIRLET7I | 327     | MIR19A   | 356      |
| MIR188   | 2         | MIR196A  | 306       | MIR29B   | 316     | MIR27B   | 352      |
| MIR222   | 2         | MIR34A   | 289       | MIR425   | 295     | MIR181A  | 326      |
| MIR338   | 2         | MIR338   | 256       | MIR193B  | 281     | MIR107   | 322      |
| MIR342   | 2         | MIR31    | 243       | MIR181A  | 280     | MIR181B  | 315      |
| MIR542   | 2         | MIR191   | 239       | MIR301A  | 271     | MIRLET7D | 313      |
| MIR92A2  | 2         | MIR181B  | 236       | MIR224   | 252     | MIR425   | 293      |
| MIRLET7A | 2         | MIRLET7E | 212       | MIR484   | 235     | MIRLET7C | 292      |
| MIR30B   | 1         | MIR425   | 203       | MIR92B   | 227     | MIR484   | 283      |
| MIR10A   | 1         | MIR423   | 184       | MIR106A  | 219     | MIR423   | 263      |
| MIR1250  | 1         | MIR107   | 178       | MIR125A  | 194     | MIR10A   | 262      |
| MIR1301  | 1         | MIR301A  | 169       | MIR29A   | 186     | MIR338   | 247      |
| MIR139   | 1         | MIR101   | 169       | MIR532   | 179     | MIR34A   | 244      |
| MIR16-1  | 1         | MIR221   | 165       | MIR25    | 175     | MIR301A  | 235      |
| MIR185   | 1         | MIR181A  | 158       | MIR424   | 156     | MIR92B   | 230      |
| MIR192   | 1         | MIR484   | 151       | MIR101   | 148     | MIR193B  | 229      |
| MIR199A1 | 1         | MIR374B  | 149       | MIR26A   | 144     | MIRLET7E | 227      |
| MIR26A2  | 1         | MIR29B   | 145       | MIR744   | 139     | MIR25    | 193      |
| MIR29A   | 1         | MIR25    | 141       | MIR30E   | 133     | MIR532   | 174      |
| MIR301A  | 1         | MIR99B   | 114       | MIR181B  | 132     | MIR106A  | 165      |
| MIR320B2 | 1         | MIR30E   | 113       | MIR222   | 131     | MIR125A  | 161      |

|         |   |         |     |          |     |         |     |
|---------|---|---------|-----|----------|-----|---------|-----|
| MIR330  | 1 | MIR92B  | 111 | MIR374B  | 125 | MIR101  | 161 |
| MIR3615 | 1 | MIR98   | 111 | MIR148   | 122 | MIR1307 | 151 |
| MIR421  | 1 | MIR222  | 109 | MIR455   | 117 | MIR424  | 149 |
| MIR492  | 1 | MIR193B | 108 | MIR99B   | 116 | MIR452  | 141 |
| MIR500A | 1 | MIR532  | 100 | MIR22    | 108 | MIR99B  | 140 |
| MIR505  | 1 | MIR106A | 96  | MIR34A   | 104 | MIR148  | 132 |
| MIR615  | 1 | MIR744  | 95  | MIR128   | 100 | MIR744  | 129 |
| MIR92A1 | 1 | MIR1307 | 92  | MIR421   | 98  | MIR98   | 126 |
| MIR92B  | 1 | MIR452  | 89  | MIR1307  | 97  | MIR221  | 123 |
|         |   | MIR660  | 83  | MIR452   | 89  | MIR421  | 117 |
|         |   | MIR22   | 82  | MIR574   | 87  | MIR222  | 113 |
|         |   | MIR424  | 81  | MIR361   | 82  | MIR22   | 109 |
|         |   | MIR361  | 79  | MIR423   | 82  | MIR30E  | 105 |
|         |   | MIR148  | 75  | MIRLET7G | 82  | MIR660  | 102 |
|         |   | MIR125A | 74  | MIR320B  | 79  | MIR128  | 99  |
|         |   | MIR210  | 74  | MIRLET7C | 77  | MIR455  | 98  |
|         |   | MIR652  | 73  | MIR30D   | 67  | MIR582  | 97  |
|         |   | MIR582  | 66  | MIRLET7E | 62  | MIR132  | 94  |
|         |   | MIR128  | 66  | MIR339   | 54  | MIR320B | 93  |
|         |   | MIR26B  | 65  | MIR582   | 54  | MIR378  | 79  |
|         |   | MIR339  | 65  | MIR28    | 52  | MIR140  | 77  |
|         |   | MIR378  | 64  | MIR197   | 51  | MIR361  | 77  |
|         |   | MIR324  | 59  | MIR132   | 47  | MIR185  | 74  |
|         |   | MIR320B | 59  | MIR330   | 47  | MIR210  | 71  |
|         |   | MIR140  | 55  | MIR98    | 46  | MIR320C | 71  |
|         |   | MIR28   | 55  | MIR192   | 45  | MIR29A  | 70  |
|         |   | MIR30D  | 53  | MIR105   | 44  | MIR652  | 70  |
|         |   | MIR185  | 46  | MIR185   | 39  | MIR330  | 60  |
|         |   | MIR345  | 46  | MIR320C  | 39  | MIR212  | 59  |
|         |   | MIR421  | 44  | MIR221   | 37  | MIR345  | 57  |
|         |   | MIR130A | 42  | MIR193A  | 34  | MIR26B  | 53  |
|         |   | MIR455  | 42  | MIR140   | 33  | MIR28   | 52  |
|         |   | MIR193A | 41  | MIR96    | 33  | MIR671  | 52  |
|         |   | MIR320C | 40  | MIRLET7D | 33  | MIR590  | 51  |
|         |   | MIR132  | 39  | MIR126   | 32  | MIR15A  | 50  |
|         |   | MIR203  | 38  | MIR15A   | 32  | MIR362  | 50  |
|         |   | MIR29A  | 38  | MIR183   | 32  | MIR193A | 49  |
|         |   | MIR574  | 38  | MIR374A  | 32  | MIR374B | 49  |
|         |   | MIR15A  | 33  | MIR590   | 29  | MIR152  | 46  |
|         |   | MIR374A | 33  | MIR182   | 28  | MIR182  | 45  |
|         |   | MIR330  | 29  | MIR210   | 28  | MIR192  | 45  |
|         |   | MIR671  | 29  | MIR629   | 28  | MIR454  | 45  |
|         |   | MIR362  | 28  | MIR345   | 27  | MIR324  | 44  |
|         |   | MIR126  | 27  | MIR130A  | 26  | MIR339  | 44  |
|         |   | MIR505  | 27  | MIR149   | 26  | MIR183  | 42  |
|         |   | MIR331  | 26  | MIR152   | 26  | MIR574  | 42  |
|         |   | MIR182  | 25  | MIR188   | 26  | MIR505  | 40  |
|         |   | MIR590  | 25  | MIR505   | 26  | MIR130A | 37  |
|         |   | MIR454  | 24  | MIR652   | 26  | MIR126  | 35  |
|         |   | MIR33A  | 23  | MIR10B   | 23  | MIR188  | 35  |
|         |   | MIR212  | 22  | MIR212   | 21  | MIR96   | 34  |
|         |   | MIR10B  | 21  | MIR33A   | 21  | MIR33A  | 33  |
|         |   | MIR183  | 20  | MIR342   | 21  | MIR105  | 30  |
|         |   | MIR502  | 20  | MIR454   | 21  | MIR342  | 28  |
|         |   | MIR149  | 17  | MIR181C  | 20  | MIR503  | 27  |
|         |   | MIR188  | 17  | MIR26B   | 20  | MIR10B  | 25  |
|         |   | MIR503  | 17  | MIR362   | 20  | MIR149  | 25  |

|          |    |          |    |          |    |
|----------|----|----------|----|----------|----|
| MIR629   | 17 | MIR660   | 18 | MIR374A  | 20 |
| MIR197   | 16 | MIR7-1   | 17 | MIR628   | 20 |
| MIR192   | 15 | MIR873   | 17 | MIR7-1   | 20 |
| MIR675   | 14 | MIR324   | 16 | MIR203   | 19 |
| MIR501   | 13 | MIR628   | 16 | MIR1301  | 18 |
| MIR551B  | 13 | MIR497   | 15 | MIR33B   | 18 |
| MIR7-1   | 13 | MIR378   | 13 | MIR197   | 17 |
| MIR105   | 13 | MIR29C   | 12 | MIR502   | 17 |
| MIR152   | 12 | MIR296   | 11 | MIR675   | 17 |
| MIR181C  | 12 | MIR500A  | 10 | MIR629   | 16 |
| MIR186   | 11 | MIR542   | 10 | MIR500A  | 15 |
| MIR320D2 | 11 | MIR671   | 10 | MIR501   | 15 |
| MIR497   | 11 | MIR877   | 10 | MIR873   | 15 |
| MIR500B  | 11 | MIR320D  | 10 | MIR331   | 13 |
| MIR96    | 10 | MIR501   | 9  | MIR1180  | 12 |
| MIR365-1 | 9  | MIR675   | 9  | MIR181C  | 12 |
| MIR1301  | 8  | MIR615   | 8  | MIR29C   | 12 |
| MIR335   | 8  | MIR1280  | 7  | MIR542   | 11 |
| MIR500A  | 8  | MIR1301  | 7  | MIR877   | 11 |
| MIR615   | 8  | MIR199B  | 7  | MIR3615  | 9  |
| MIR873   | 8  | MIR33B   | 7  | MIR497   | 9  |
| MIR877   | 8  | MIR503   | 7  | MIR551B  | 9  |
| MIR1180  | 7  | MIR7-3   | 7  | MIR1280  | 8  |
| MIR29C   | 7  | MIR139   | 6  | MIR335   | 8  |
| MIR32    | 7  | MIR1908  | 6  | MIR196B  | 7  |
| MIR33B   | 7  | MIR2110  | 6  | MIR2110  | 7  |
| MIR342   | 7  | MIR146B  | 5  | MIR7-2   | 7  |
| MIR545   | 7  | MIR196B  | 5  | MIR296   | 6  |
| MIR628   | 7  | MIR199A2 | 5  | MIR32    | 6  |
| MIR7-2   | 6  | MIR301B  | 5  | MIR500B  | 6  |
| MIR767   | 6  | MIR502   | 5  | MIR766   | 6  |
| MIR1296  | 5  | MIR579   | 5  | MIR139   | 5  |
| MIR199B  | 5  | MIR7-2   | 5  | MIR2355  | 5  |
| MIR2110  | 5  | MIR1304  | 4  | MIR301B  | 5  |
| MIR296   | 5  | MIR2355  | 4  | MIR550A1 | 5  |
| MIR542   | 5  | MIR32    | 4  | MIR579   | 5  |
| MIR1280  | 4  | MIR328   | 4  | MIR615   | 5  |
| MIR1304  | 4  | MIR340   | 4  | MIR1250  | 4  |
| MIR130B  | 4  | MIR500B  | 4  | MIR1254  | 4  |
| MIR190   | 4  | MIR550A1 | 4  | MIR340   | 4  |
| MIR195   | 4  | MIR589   | 4  | MIR545   | 4  |
| MIR196B  | 4  | MIR1254  | 3  | MIR589   | 4  |
| MIR199A1 | 4  | MIR331   | 3  | MIR641   | 4  |
| MIR199A2 | 4  | MIR335   | 3  | MIR876   | 4  |
| MIR218-1 | 4  | MIR486   | 3  | MIR940   | 4  |
| MIR7-3   | 4  | MIR551B  | 3  | MIR146B  | 3  |
| MIR200C  | 3  | MIR874   | 3  | MIR181D  | 3  |
| MIR218-2 | 3  | MIR1180  | 2  | MIR195   | 3  |
| MIR2355  | 3  | MIR129-2 | 2  | MIR199A2 | 3  |
| MIR301B  | 3  | MIR135B  | 2  | MIR199B  | 3  |
| MIR328   | 3  | MIR181D  | 2  | MIR200C  | 3  |
| MIR365-2 | 3  | MIR199A1 | 2  | MIR30D   | 3  |
| MIR579   | 3  | MIR203   | 2  | MIR328   | 3  |
| MIR720   | 3  | MIR217   | 2  | MIR489   | 3  |
| MIR766   | 3  | MIR218-1 | 2  | MIR935   | 3  |
| MIR876   | 3  | MIR218-2 | 2  | MIR1247  | 2  |
| MIR940   | 3  | MIR450B  | 2  | MIR1256  | 2  |

|           |   |            |   |          |   |
|-----------|---|------------|---|----------|---|
| MIR1266   | 2 | MIR545     | 2 | MIR199A1 | 2 |
| MIR129-1  | 2 | MIR767     | 2 | MIR218-1 | 2 |
| MIR129-2  | 2 | MIR876     | 2 | MIR218-2 | 2 |
| MIR146B   | 2 | MIR935     | 2 | MIR219-1 | 2 |
| MIR181D   | 2 | MIRLET7BHG | 2 | MIR320D1 | 2 |
| MIR200B   | 2 | MIR1227    | 1 | MIR320E  | 2 |
| MIR2116   | 2 | MIR1249    | 1 | MIR365-1 | 2 |
| MIR320E   | 2 | MIR1250    | 1 | MIR450B  | 2 |
| MIR3615   | 2 | MIR1256    | 1 | MIR576   | 2 |
| MIR450B   | 2 | MIR1272    | 1 | MIR625   | 2 |
| MIR550A1  | 2 | MIR1275    | 1 | MIR720   | 2 |
| MIR636    | 2 | MIR1286    | 1 | MIR942   | 2 |
| MIR641    | 2 | MIR1287    | 1 | MIR95    | 2 |
| MIR651    | 2 | MIR1294    | 1 | MIR1226  | 1 |
| MIR874    | 2 | MIR130B    | 1 | MIR1228  | 1 |
| MIR887    | 2 | MIR138-1   | 1 | MIR1237  | 1 |
| MIR935    | 2 | MIR181A2HG | 1 | MIR1275  | 1 |
| MIR95     | 2 | MIR186     | 1 | MIR1277  | 1 |
| MIR1228   | 1 | MIR1910    | 1 | MIR1287  | 1 |
| MIR1250   | 1 | MIR195     | 1 | MIR129-1 | 1 |
| MIR1256   | 1 | MIR200C    | 1 | MIR1292  | 1 |
| MIR1283-2 | 1 | MIR205     | 1 | MIR1296  | 1 |
| MIR1287   | 1 | MIR320E    | 1 | MIR1304  | 1 |
| MIR1294   | 1 | MIR3615    | 1 | MIR130B  | 1 |
| MIR135B   | 1 | MIR451     | 1 | MIR1343  | 1 |
| MIR139    | 1 | MIR489     | 1 | MIR138-1 | 1 |
| MIR1910   | 1 | MIR491     | 1 | MIR186   | 1 |
| MIR1915   | 1 | MIR519A1   | 1 | MIR190   | 1 |
| MIR214    | 1 | MIR521-1   | 1 | MIR1908  | 1 |
| MIR217    | 1 | MIR521-2   | 1 | MIR1910  | 1 |
| MIR2278   | 1 | MIR548E    | 1 | MIR1914  | 1 |
| MIR320D1  | 1 | MIR548Q    | 1 | MIR1976  | 1 |
| MIR340    | 1 | MIR584     | 1 | MIR217   | 1 |
| MIR450A2  | 1 | MIR588     | 1 | MIR2277  | 1 |
| MIR486    | 1 | MIR597     | 1 | MIR2278  | 1 |
| MIR489    | 1 | MIR627     | 1 | MIR320D2 | 1 |
| MIR491    | 1 | MIR651     | 1 | MIR326   | 1 |
| MIR499    | 1 | MIR760     | 1 | MIR450A1 | 1 |
| MIR521-2  | 1 | MIR766     | 1 | MIR491   | 1 |
| MIR548K   | 1 | MIR887     | 1 | MIR499   | 1 |
| MIR548Q   | 1 | MIR940     | 1 | MIR519A1 | 1 |
| MIR550A2  | 1 | MIR941-2   | 1 | MIR522   | 1 |
| MIR570    | 1 |            |   | MIR551A  | 1 |
| MIR577    | 1 |            |   | MIR561   | 1 |
| MIR584    | 1 |            |   | MIR597   | 1 |
| MIR588    | 1 |            |   | MIR624   | 1 |
| MIR589    | 1 |            |   | MIR636   | 1 |
| MIR624    | 1 |            |   | MIR643   | 1 |
| MIR642A   | 1 |            |   | MIR651   | 1 |
| MIR670    | 1 |            |   | MIR7-3   | 1 |
| MIR760    | 1 |            |   | MIR767   | 1 |
| MIR941-1  | 1 |            |   | MIR9-2   | 1 |
| MIR941-3  | 1 |            |   | MIR941-2 | 1 |
| MIR942    | 1 |            |   | MIR941-3 | 1 |

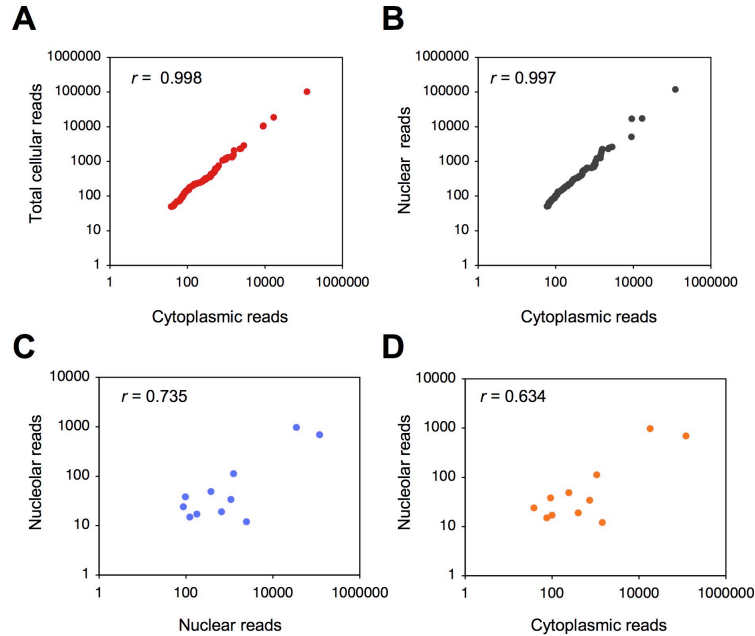

**Figure S1.** Scatter plot analyses of miRNA reads in the cellular compartments. **(A)** Total cellular reads compared to cytoplasmic reads. **(B)** Nuclear reads compared to cytoplasmic reads. **(C)** Nucleolar reads compared to nuclear reads. **(D)** Nucleolar reads compared to cytoplasmic reads. Read cut-offs; A and B  $\geq 50$  reads, C and D nucleolar reads  $\geq 5$ . Pearson correlation coefficients are indicated ( $r$ ).

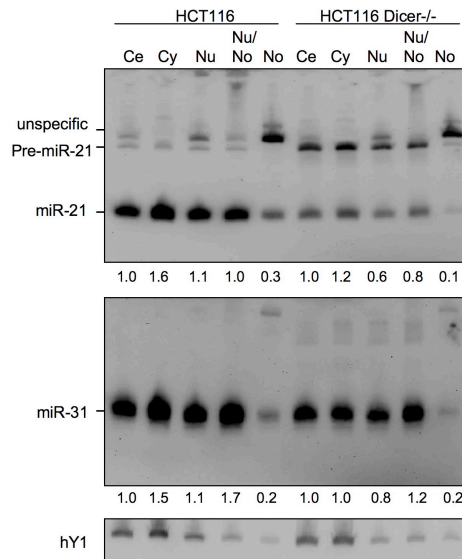

**Figure S2.** MiR-21 and miR-31 expression in subcellular compartments in Dicer-proficient and deficient cells. RNA was isolated from subcellular compartments of HCT116 wild -type and HCT116 Dicer <sup>-/-</sup> cells. RNA (25  $\mu$ g) was separated on 15% gel and probed by Northern hybridization using miR-21 and miR-31 LNA probes. The respective mature and precursor forms are shown. hY1 was used as a control for cellular fractionation. Relative abundancies of miRNAs are expressed as compared to total cellular RNA in each cell line set as 1.
